# Supplementary material for: Cystatin C serum levels in healthy children are related to age, gender, and pubertal stage
Source: Springer Nature journal article supplement (doi:10.1007/s00467-018-4087-z), 2018-11-20
Supplement: MOESM1 [file 16283638]

## Supplementary Materials

### Cystatin C serum levels in healthy children are related to age, gender and pubertal stage

Niels Ziegelasch<sup>1</sup>, Mandy Vogel<sup>1,2</sup>, Markus Löffler, MD<sup>3</sup>, Eva Müller, MD<sup>1</sup>, Nadin Tremel, MD<sup>1</sup>, Anne Jurkutat<sup>1</sup>, Nicolas Terliesner, MD<sup>4</sup>, Joachim Thiery, MD<sup>5</sup>, Anja Willenberg, PhD<sup>5</sup>, Wieland Kiess, MD<sup>1,2,4</sup>, Katalin Dittrich, MD<sup>2,4</sup>

<sup>1</sup> LIFE Leipzig Research Centre for Civilization Diseases, University of Leipzig, Philipp-Rosenthalstrasse 27, 04103 Leipzig, Germany

<sup>2</sup> Centre of Paediatric Research (CPL), University of Leipzig, 04103 Leipzig, Germany

<sup>3</sup> Institute for Medical Informatics, Statistics and Epidemiology (IMISE), University of Leipzig, 04107 Leipzig

<sup>4</sup> Hospital for Children and Adolescents, University of Leipzig, 04103 Leipzig, Germany

<sup>5</sup> Institute for Laboratory Medicine, Clinical Chemistry and Molecular Diagnostic (ILM), University Hospital Leipzig, 04103 Leipzig, Germany

**Corresponding Author:** Dr. med. Katalin Dittrich, Hospital for Children and Adolescents, University of Leipzig, Liebigstraße 20a, D-04103 Leipzig; Phone: +49 341 9726325 Fax: +49 341 9726009, E-Mail: [katalin.dittrich@medizin.uni-leipzig.de](mailto:katalin.dittrich@medizin.uni-leipzig.de)

**Online Resource 1.** Percentiles of sCrea and its effector variable age for 0- to 18-year-old-children of the LIFE Child cohort.

**Online Resource 2.** Passing-Bablok Regression Cystatin C 2nd generation against 1st Generation.

**Online Resource 3.** Bland-Altman-Blot absolute deviation.

**Online Resource 4.** Percentiles of sCrea ( $\mu\text{mol/l}$ ) as a function of age based on the LIFE Child cohort with 0- to 18-year-old children.

**Online Resource 1.** Percentiles of sCrea and its effector variable age for 0- to 18-year-old-children of the LIFE Child cohort.

Blue = male, red = female participants. Solid line = 50th percentile, dotted line = 10th and 90th percentile, dashed line = 2.5th and 97.5th percentile. P = Percentile. The percentiles were calculated using the ChildSDS package<sup>36</sup>. Note that at the age of 12 years, the curves diverge and show different patterns for males and females thereafter. n = 6 217 observations in 2 803 participants.

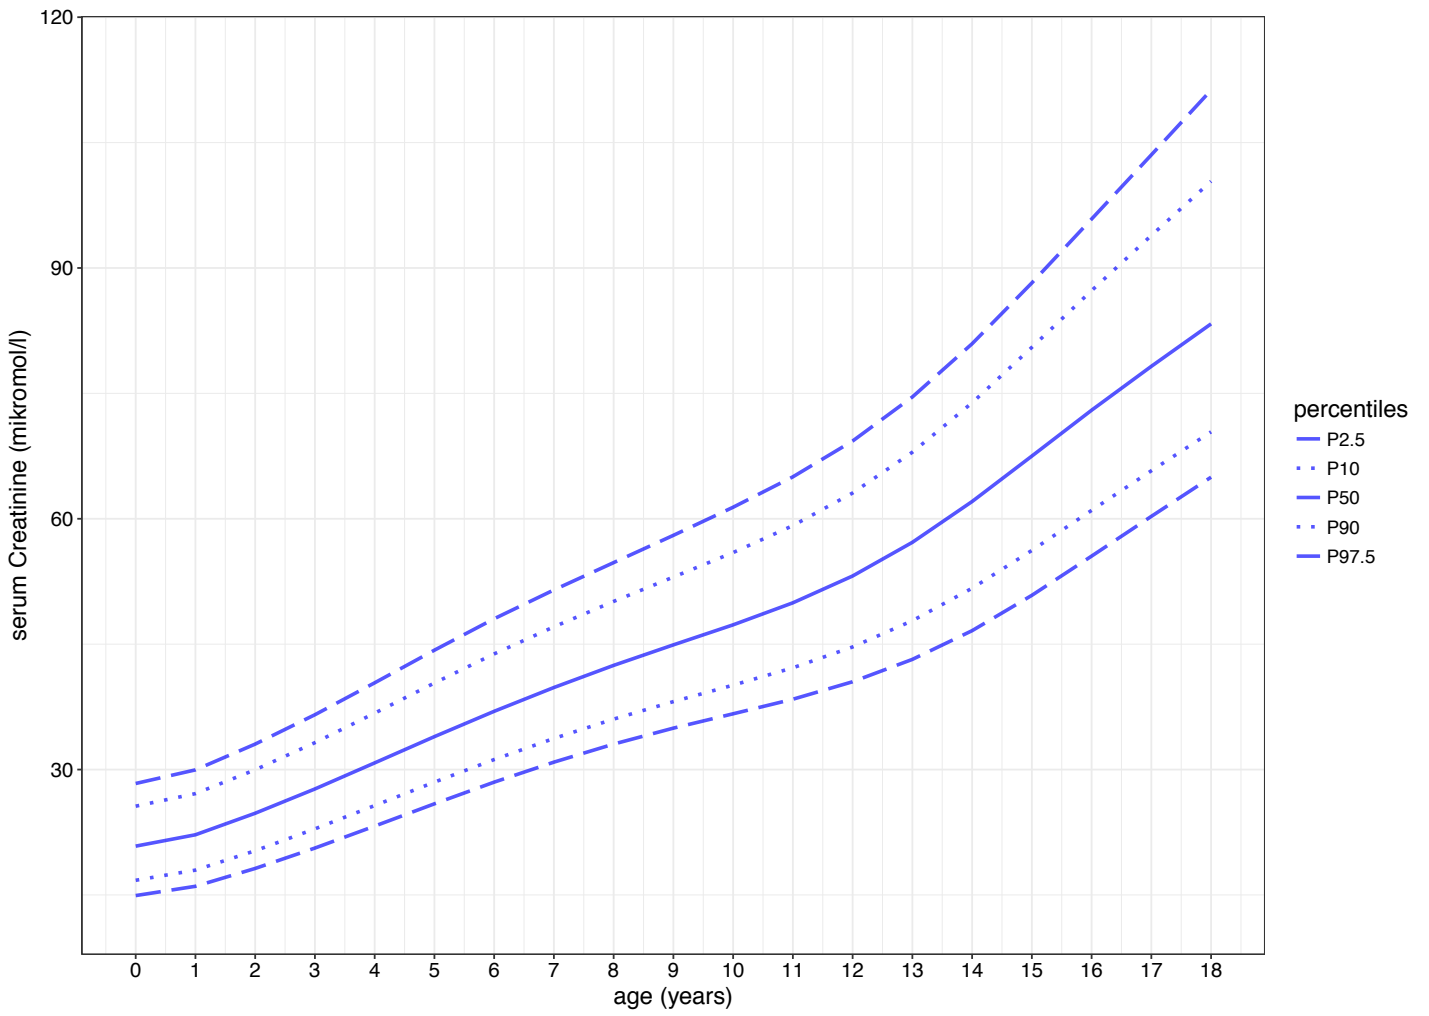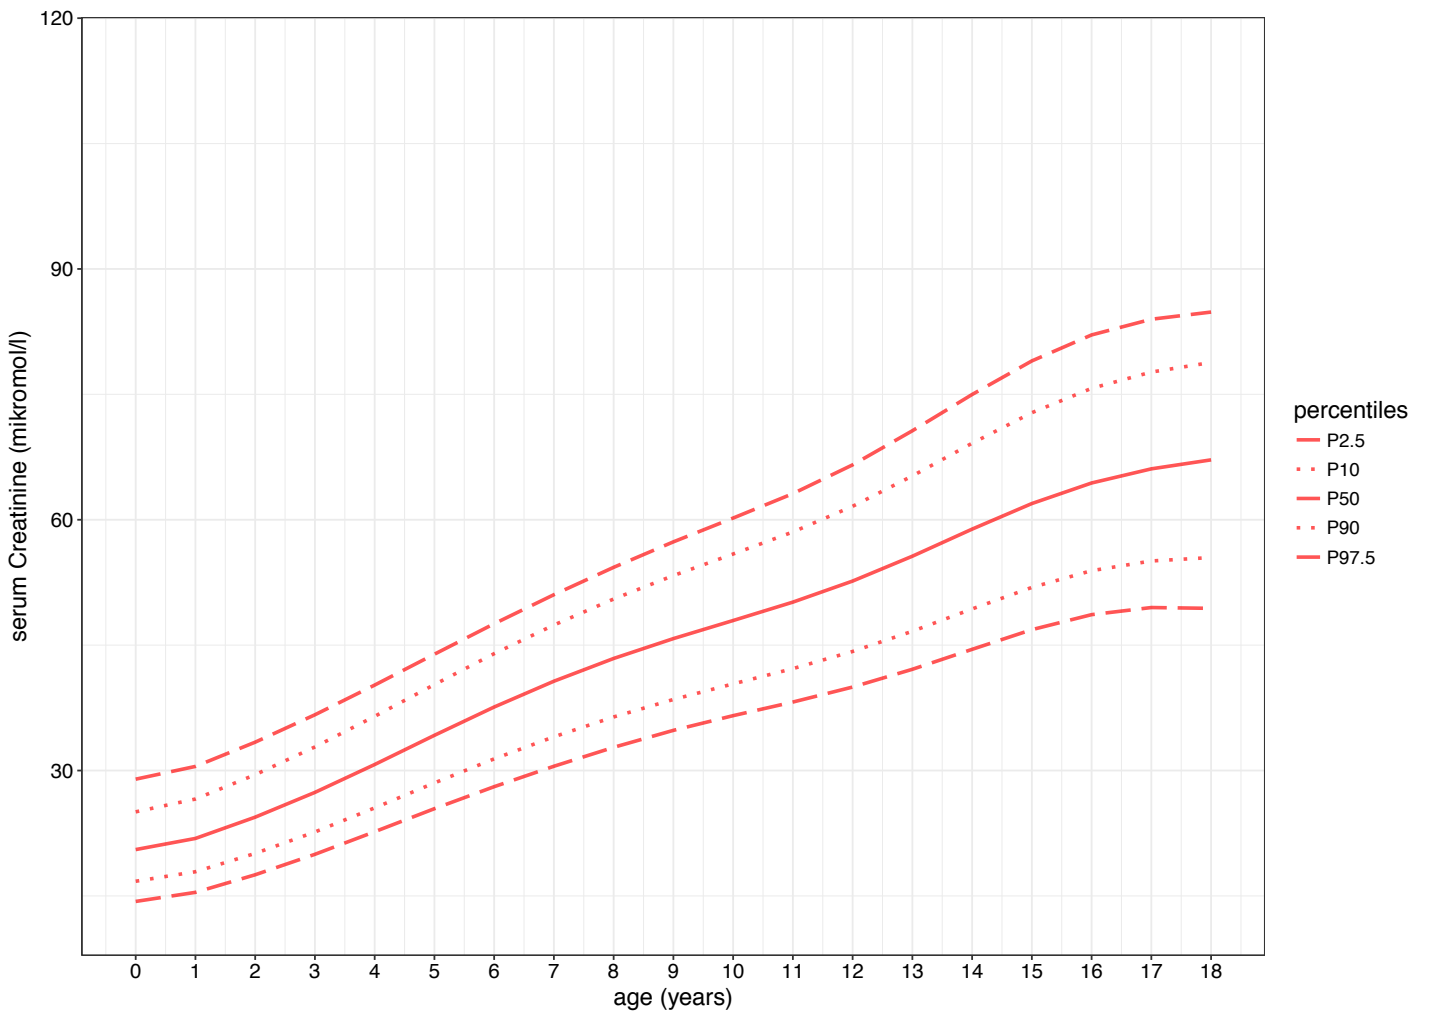

**Online Resource 2.** Passing-Bablok Regression Cystatin C 2nd generation against 1st Generation

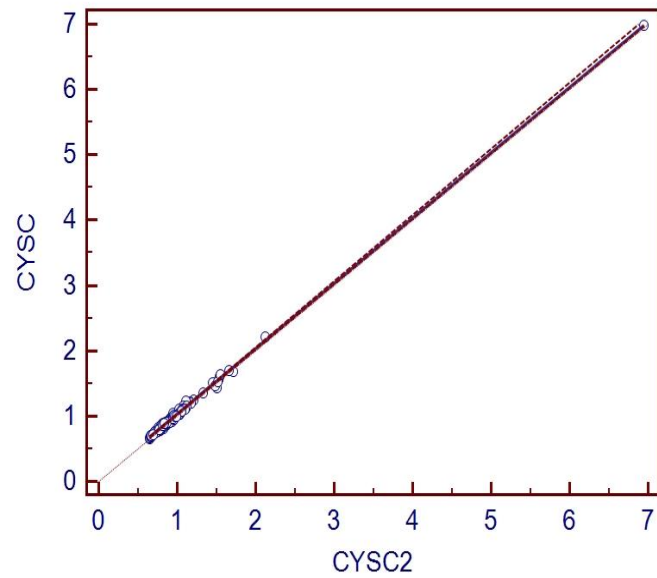

**Online Resource 3.** Bland-Altman-Blot absolute deviation

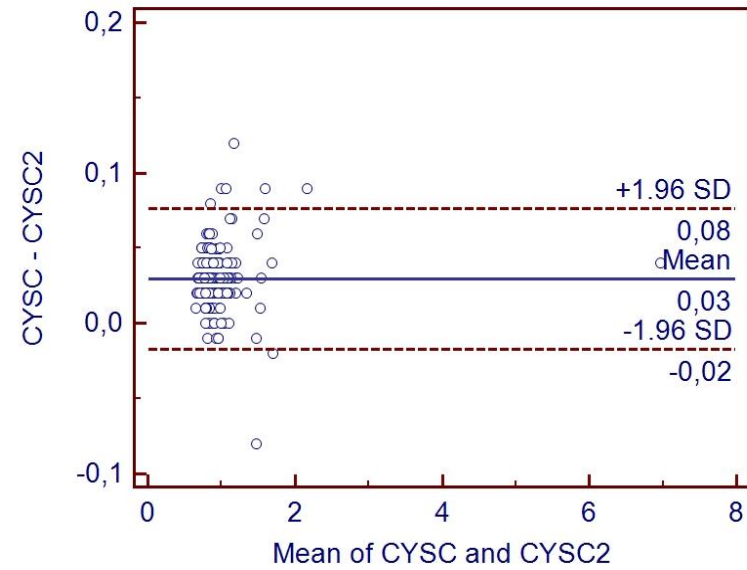

Comparative measurement of 143 serum samples between Tina-quant® Cystatin C and Tina-quant® Cystatin C 2nd generation. Using MedCalc (MedCalc Software bvba, Belgium) Passing-Bablok-regression (2) (Online Resource 2) and Bland-Altman-Blot (Online Resource 3) were calculated. Both show a good conformity between the first and the second generation.

**Online Resource 4.** Percentiles of *sCrea* ( $\mu\text{mol/l}$ ) as a function of age based on the LIFE Child cohort with 0- to 18-year-old children.

| age | P2.5 M | P2.5 F | P10 M | P10 F | P50 M | P50 F | P90 M | P90 F | P97.5 M | P97.5 F | Mu M  | Mu F  | Sigma M | Sigma F | Nu M  | Nu F | Tau M | Tau F |
|-----|--------|--------|-------|-------|-------|-------|-------|-------|---------|---------|-------|-------|---------|---------|-------|------|-------|-------|
| 0   | 14.92  | 14.34  | 16.75 | 16.76 | 20.84 | 20.54 | 25.62 | 25.06 | 28.33   | 28.97   | 20.84 | 20.54 | 0.16    | 0.17    | 0.26  | 0.13 | 2.14  | 1.21  |
| 1   | 16.04  | 15.43  | 17.97 | 17.89 | 22.20 | 21.88 | 27.12 | 26.59 | 29.96   | 30.49   | 22.20 | 21.88 | 0.16    | 0.16    | 0.26  | 0.15 | 2.08  | 1.28  |
| 2   | 18.17  | 17.53  | 20.29 | 20.09 | 24.77 | 24.42 | 29.97 | 29.50 | 33.05   | 33.39   | 24.77 | 24.42 | 0.15    | 0.16    | 0.24  | 0.18 | 1.99  | 1.40  |
| 3   | 20.61  | 19.98  | 22.90 | 22.65 | 27.68 | 27.39 | 33.22 | 32.82 | 36.56   | 36.67   | 27.68 | 27.39 | 0.15    | 0.15    | 0.20  | 0.25 | 1.94  | 1.52  |
| 4   | 23.24  | 22.68  | 25.69 | 25.53 | 30.80 | 30.72 | 36.75 | 36.48 | 40.38   | 40.22   | 30.80 | 30.72 | 0.14    | 0.14    | 0.14  | 0.41 | 1.92  | 1.66  |
| 5   | 25.90  | 25.44  | 28.49 | 28.52 | 33.94 | 34.21 | 40.35 | 40.28 | 44.28   | 43.91   | 33.94 | 34.21 | 0.14    | 0.14    | 0.06  | 0.63 | 1.93  | 1.78  |
| 6   | 28.49  | 28.07  | 31.20 | 31.40 | 36.97 | 37.60 | 43.83 | 43.98 | 48.04   | 47.56   | 36.97 | 37.60 | 0.13    | 0.13    | -0.03 | 0.83 | 1.96  | 1.89  |
| 7   | 30.89  | 30.51  | 33.72 | 34.04 | 39.81 | 40.68 | 47.07 | 47.41 | 51.48   | 51.03   | 39.81 | 40.68 | 0.13    | 0.13    | -0.05 | 0.93 | 1.99  | 1.96  |
| 8   | 33.05  | 32.78  | 36.03 | 36.41 | 42.46 | 43.41 | 50.11 | 50.52 | 54.76   | 54.31   | 42.46 | 43.41 | 0.13    | 0.13    | -0.06 | 0.90 | 1.99  | 2.02  |
| 9   | 34.95  | 34.81  | 38.13 | 38.50 | 44.91 | 45.78 | 53.03 | 53.32 | 58.02   | 57.35   | 44.91 | 45.78 | 0.13    | 0.13    | -0.08 | 0.79 | 1.96  | 2.04  |
| 10  | 36.67  | 36.56  | 40.10 | 40.37 | 47.31 | 47.94 | 55.96 | 55.90 | 61.38   | 60.20   | 47.31 | 47.94 | 0.13    | 0.13    | -0.08 | 0.70 | 1.91  | 2.04  |
| 11  | 38.41  | 38.19  | 42.17 | 42.19 | 49.95 | 50.15 | 59.18 | 58.54 | 65.02   | 63.12   | 49.95 | 50.15 | 0.13    | 0.13    | -0.02 | 0.67 | 1.87  | 2.02  |
| 12  | 40.50  | 39.99  | 44.67 | 44.24 | 53.15 | 52.67 | 63.08 | 61.61 | 69.30   | 66.57   | 53.15 | 52.67 | 0.14    | 0.13    | 0.09  | 0.64 | 1.86  | 1.99  |
| 13  | 43.18  | 42.11  | 47.80 | 46.66 | 57.18 | 55.64 | 67.96 | 65.24 | 74.57   | 70.64   | 57.18 | 55.64 | 0.14    | 0.13    | 0.21  | 0.60 | 1.88  | 1.96  |
| 14  | 46.61  | 44.50  | 51.69 | 49.33 | 62.06 | 58.88 | 73.87 | 69.15 | 80.94   | 74.98   | 62.06 | 58.88 | 0.14    | 0.13    | 0.27  | 0.56 | 1.92  | 1.95  |
| 15  | 50.84  | 46.85  | 56.21 | 51.90 | 67.50 | 61.94 | 80.51 | 72.81 | 88.21   | 79.00   | 67.50 | 61.94 | 0.14    | 0.13    | 0.21  | 0.53 | 1.98  | 1.95  |
| 16  | 55.53  | 48.65  | 61.01 | 53.91 | 72.99 | 64.40 | 87.29 | 75.72 | 95.85   | 82.11   | 72.99 | 64.40 | 0.14    | 0.13    | 0.01  | 0.55 | 2.03  | 1.97  |
| 17  | 60.29  | 49.50  | 65.74 | 55.07 | 78.24 | 66.09 | 93.89 | 77.66 | 103.53  | 83.98   | 78.24 | 66.09 | 0.14    | 0.13    | -0.27 | 0.71 | 2.08  | 2.01  |

The 2.5th, 10th, 90th, and 97.5th percentiles as well as the median are given. Blue = male, red = female participants. Abbreviations: P = percentile, M = male, F = female, Mu = location parameter,

Sigma = spread Parameter, Nu = skewness parameter, Tau = kurtosis parameter. All values were calculated applying generalized additive models for location, shape and scale as implemented in gamlss

<sup>35</sup> and childstds <sup>36</sup>. n = 6 217 observations in 2 803 participants. Note, that at the age of 12 years, *sCrea* values of male adolescents (P50) raise and are higher compared to females up to the age of 18 years.
